# Supplementary material
Source: Springer Nature journal article supplement (https://www.springermedizin.de/resource/supplementary/12902_2010_105_MOESM1_ESM.pdf/9515546)

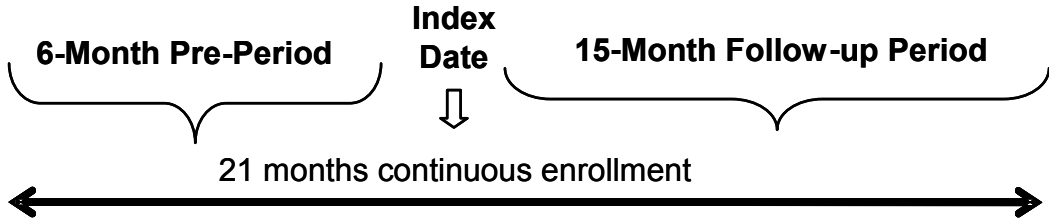

**2+ Basal insulin scripts**  
**1+ Type 2 diabetes dx**

**1<sup>st</sup> mealtime script**

Supplement: MOESM1 [file 9515546]
